# Supplementary material for: The Inhibition of TREK-1 K+ Channels via Multiple Compounds Contained in the Six Kamikihito Components, Potentially Stimulating Oxytocin Neuron Pathways
Source: MDPI journal article supplement (doi:10.3390/ijms25094907), 2024-04-30
Supplement: s1 [file s1]

## Supplementary Figure legends

**Supplementary Figure 1. Effects of a TREK-1 agonist ML335 in HEK293 cells or TREK-1-expressing HEK293 cells.** (A) HEK293 cells were treated with vehicle or ML335 ( $10^{-5}$  M) and intensity of fluorescence were measured using a FluxOR™ potassium ion channel assay. Representative tracing of the fluorescence intensity in randomly selected HEK293 cells treated with vehicle ( $n = 15$ , the right figure) or ML-335 ( $n = 15$ , the center figure). The activity of TREK-1 was estimated using the time to peak fluorescence following vehicle ( $n = 63$ ) or ML335 ( $n = 39$ ) treatment (the left figure). (B) Representative tracing of the fluorescence intensity in randomly selected TREK-1-expressing HEK293 cells treated with vehicle ( $n = 15$ , the right figure) or ML-335 ( $n = 15$ , the center figure). The activity of TREK-1 was estimated using the time to peak fluorescence following vehicle ( $n = 102$ ) or ML335 ( $n = 105$ ) treatment (the left figure). The data were expressed as the mean  $\pm$  SEM. \*\*\* indicated  $p < 0.001$ , compared with vehicle; Mann-Whitney test.

**Supplementary Figure 2. Effects of a TREK-1 agonist ML335 in TREK-1-expressing HEK293 cells using a FluxOR™ potassium ion channel assay.** The cells were pretreated with vehicle for 2 min and subsequently treated with vehicle or ML335 ( $10^{-5}$  M). Representative tracing of the fluorescence intensity in randomly selected HEK293 cells treated with vehicle ( $n = 15$ , A) or ML-335 ( $n = 15$ , B). The activity of TREK-1 was estimated using the time to peak fluorescence following 2nd vehicle ( $n = 98$ ) or 2nd ML335 ( $n = 119$ ) treatment (C). The data were expressed as the mean  $\pm$  SEM. \*\*\* indicated  $p < 0.001$ , compared with vehicle; Mann-Whitney test.
